# Supplementary material for: Combining Fungal Biopesticides and Insecticide-Treated Bednets to Enhance Malaria Control
Source: PLoS Comput Biol. 2009 Oct 2;5(10):e1000525. doi: 10.1371/journal.pcbi.1000525 (PMC2742557; doi:10.1371/journal.pcbi.1000525)
Supplement: Table S3 — Model variables. (0.05 MB DOC) [file pcbi.1000525.s005.doc]

Table S3. Model variables

| Symbol | Definition | Value |
| --- | --- | --- |
| *p* | age of *Plasmodium* infection | 0-*TE* (d) |
| *u* | age of fungal infection | varies (d) |
| *a* | time that non-host-seeking mosquitoes have spent in the current non-host-seeking stage | varies (d) |
|  | time that non-host-seeking mosquitoes have spent in the current non-host-seeking stage when their *Plasmodium* infection age reaches *TE* | varies (d) |
|  | time spent in the *i*th host-seeking stage | varies (d) |
|  | number of gonotrophic cycles beyond which the probability of remaining in the susceptible stage is less than 0.0001. | 10 |
|  | maximum number of gonotrophic cycles in the exposed stage |  |
|  | number of gonotrophic cycles beyond which the probability of remaining in the infectious stage is less than 0.0001. | 10 |
|  | Rate parameter of the Weibull model of fungal pathogen-induced mortality (see text) | varies |
| ** | Shape parameter of the Weibull model of fungal pathogen-induced mortality (see text) | 3.5 |
|  | Fungal pathogen-induced mortality rate | varies |
|  | Average time to death due to fungal infection (see text) | varies |
